# Supplementary material
Source: PubMed Central journal article supplement (PMC3376640)
Supplement: mmc1.pdf [file mmc1.pdf]

## Supplemental Data

### PSORS2 is Due to Mutations in *CARD14*

Catherine T. Jordan, Li Cao, Elisha D.O. Roberson, Katherine C. Pierson, Chi-Fan Yang, Cailin E. Joyce, Caitriona Ryan, Shenghui Duan, Cynthia A. Helms, Yin Liu, Yongqing Chen, Alison A. McBride, Wuh-Liang Hwu, Jer-Yuarn Wu, Yuan-Tsong Chen, Alan Menter, Raphaela Goldbach-Mansky, Michelle A. Lowes, and Anne M. Bowcock

|                    | p.Gly117Ser<br>*                                                               | p.Glu138Ala<br>* |
|--------------------|--------------------------------------------------------------------------------|------------------|
| <b>Human</b>       | LVTG LQPDVDFSNFS <b>GL</b> METSKLTECLAG A IGS LQE <b>EL</b> LNQEKGGQKEVLLRRC   |                  |
| <b>Chimp</b>       | LVTG LQPDVDFSNFS <b>GL</b> METSKLTECLAG A IGS LQE <b>EL</b> LNQEKGGQKEVLLRRC   |                  |
| <b>Rhesus</b>      | LVTG LQPDVDFSNFS <b>GL</b> METSKLTECLAG A IGS LQE <b>EL</b> LNQEKGGQKEVLLRRC   |                  |
| <b>Mouse</b>       | LVTG LQSD IDFS TFS <b>GL</b> METSKLTECLAG A IS S LQE <b>EL</b> LAQEKAQKEVLLRRC |                  |
| <b>Cow</b>         | LVTG LQPS VDFTNFS <b>GL</b> METSKLTECLAG A IGS LQE <b>EL</b> SQEKGGQKEALLRQC   |                  |
| <b>Dog</b>         | LVTG LQPQV DFNFS <b>GL</b> METAKLTECLAG A IGS LQE <b>EL</b> SQEKGGQKEALLQRC    |                  |
| <b>Opossum</b>     | LVTG LEPS VDSGSFR <b>GL</b> I DTSTLTECLAS A I KS LQQ <b>EL</b> SQEKL RSHVLQQQC |                  |
| <b>Fugu</b>        | QATGHKPSTEPSRFS <b>GL</b> I KYSELTEYLVRAVTGMQK <b>EL</b> -QEARQGGRAR - PR      |                  |
| <b>Stickleback</b> | QVTGRKPSTEPSRFS <b>GL</b> I KYSELTEYLVRAVTGMQK <b>EL</b> -QAARQKERPL - PL      |                  |

**Figure S1. Conservation of the Amino Acids Altered in the Familial Forms of Psoriasis and the Pustular Psoriasis Case**

Alignment of *CARD14* protein sequence are shown for the indicated species. Sequences were downloaded from the UCSC Genome Browser<sup>1</sup> and aligned with ClustalW2.<sup>2;3</sup> Altered amino acids are in bold and marked with asterisks. The genome builds used for each species were as follows: human (hg19), chimp (panTro2), rhesus (rheMac2), mouse (mm9), cow (bosTau4), dog (canFam2), opossum (monDom5), fugu (fr2), stickleback (gasAcu1), medaka (oryLat2).

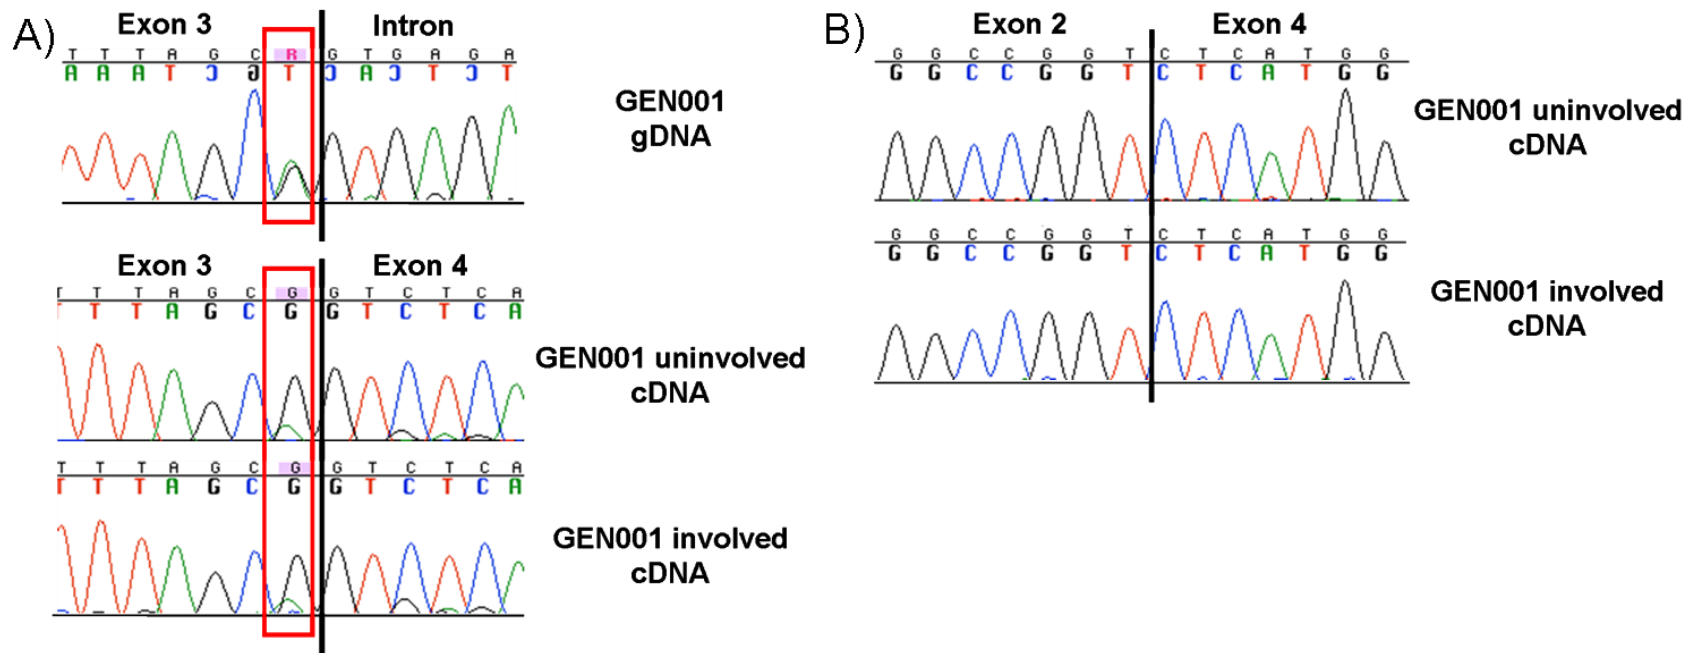

**Figure S2. Sequencing of Skin-Derived cDNA from an Affected Member of Family PS1 Confirms Low-Level, In-Frame Expression of the Mutant c.349A Allele and Reveals an Isoform with Splicing Directly from Exons 2 to 4**

Genomic DNA and RNA were isolated from the blood and skin (involved and uninvolved), respectively, of an affected member of family PS1 (GEN001). cDNA was isolated from RNA samples, and cDNA or genomic DNA were subjected to PCR-based sequencing with oligonucleotide primers from exon 2 and 4 of *CARD14* after purification following agarose gel electrophoresis where two PCR products had been observed (575bp and 303bp).

(A) Chromatogram obtained after sequencing the 575bp fragment revealed that the mutant to check for expression of the c.349G>A allele, (present in ~ 50% of genomic DNA fragments), was detected at lower level in cDNA from skin mutation. The mutant allele is shown to be expressed at a low level in skin on the basis of the ratios of the “G” to “A” alleles.

(B) Chromatogram obtained after sequencing the 303bp fragment revealed skipping of exon 3 peak heights of the mutant allele in sequencing traces obtained in both directions.

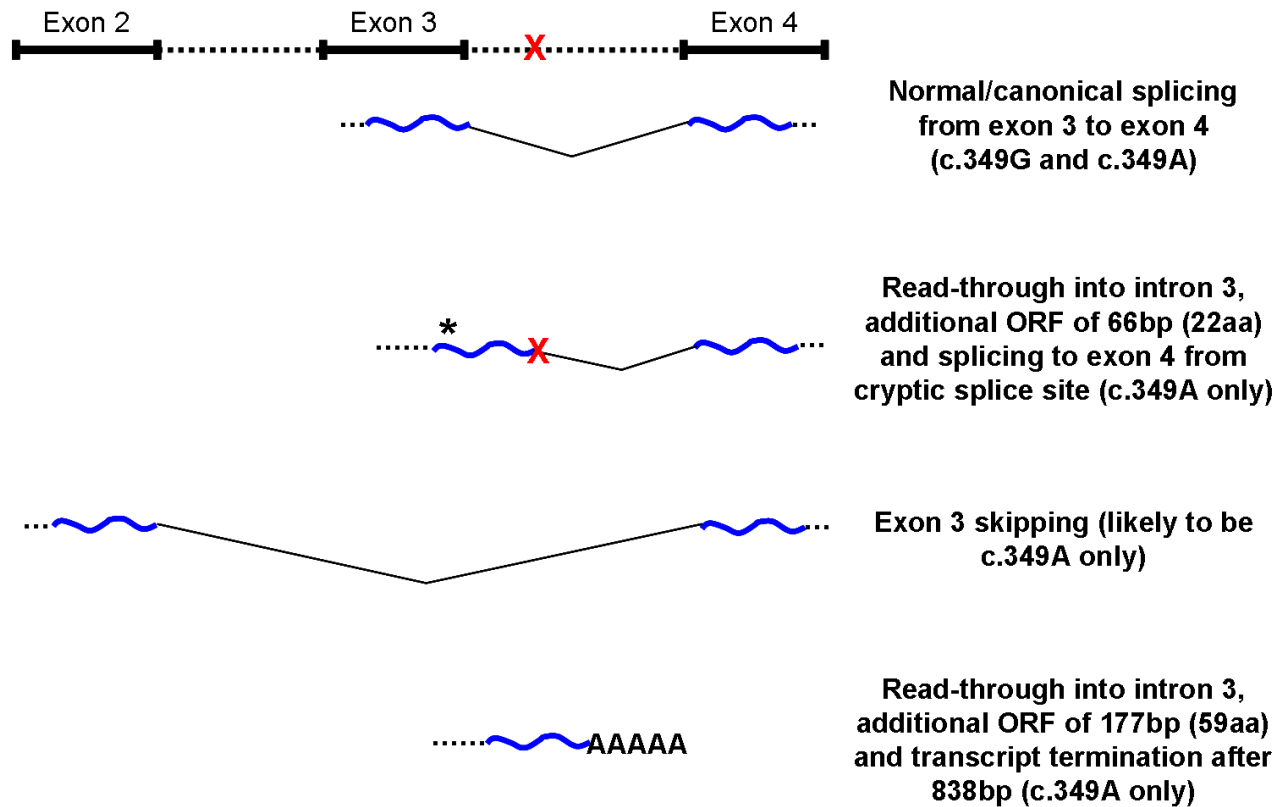

**Figure S3. Schematic of Different RNA Species from the Exon 2-4 Region of *CARD14* Identified in Healthy Controls and Psoriatic Skin (Classic and GEN001) with RNA-Seq**

RNA sequencing was performed with RNA from involved and uninvolved skin of GEN001. RNA was also isolated from skin biopsies of healthy controls (n=3) and matched pairs of involved and uninvolved skin from individuals with classical psoriasis (n=3 pairs). RNA libraries were generated according to manufacturer's specifications with the Illumina mRNA Sequencing kit. RNA libraries were subjected to paired-end sequencing on an Illumina HiSeq2000 for 101 cycles. Sequenced reads were aligned to the human hg19 reference genome with TopHat v1.3.2.<sup>4,5</sup> Transcript assembly was performed with Cufflinks v.1.1.0.<sup>6</sup> Results from the exon 2-4 region of *CARD14* are presented. Exons 2, 3, and 4 are represented by the bold lines, introns are represented by dotted lines and "X" represents the intronic cryptic splice site predicted by *in vitro* minigene assays with the family PS1 (c.349G>A) mutation.. Supplementary Table 3 provides the percent and number of contigs for each species. \*Contig variant predicted by minigene assay. ORF – open reading frame, bp – base pairs, aa – amino acids.

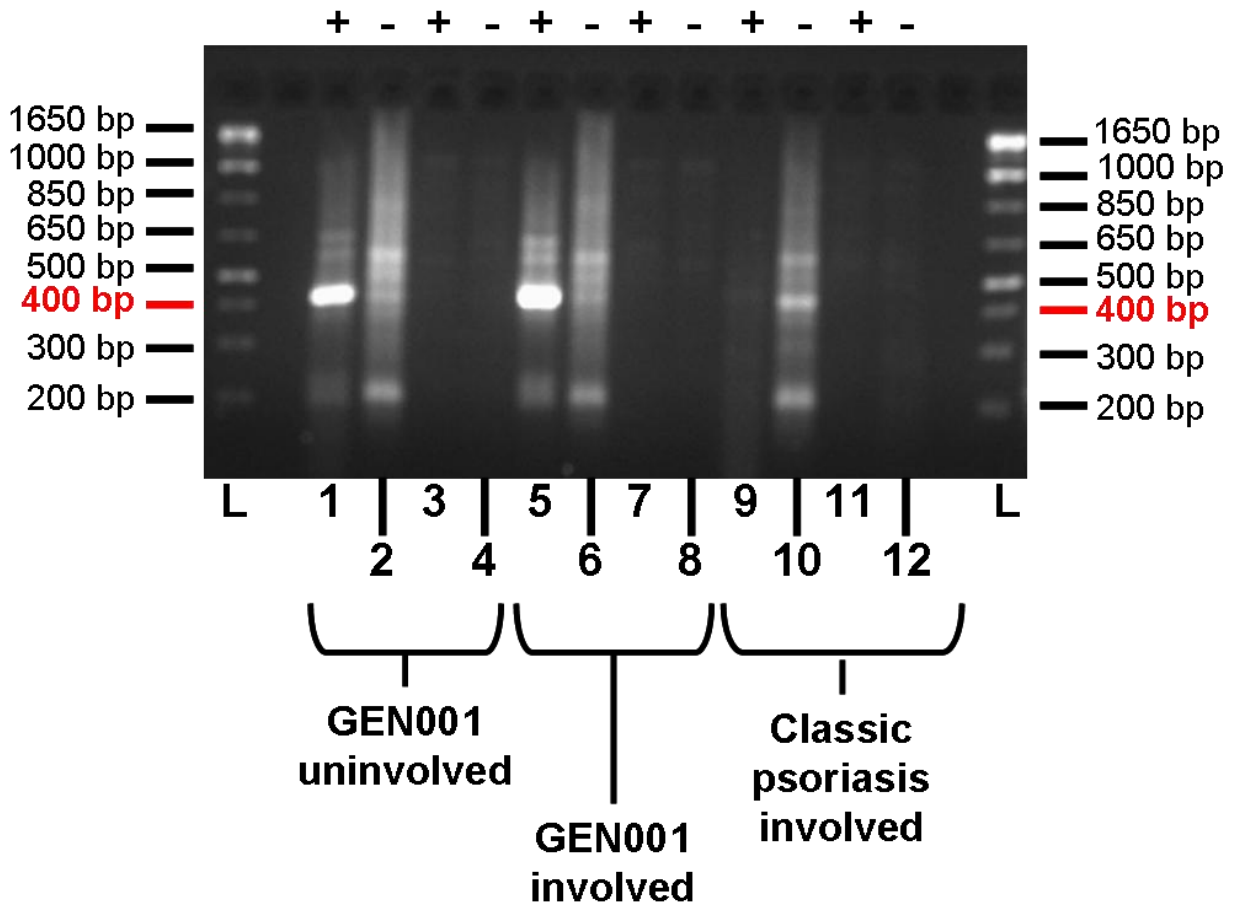

**Figure S4. *CARD14* Transcripts of the Isoform with the 838 bp Intronic Sequence Insertion after Exon 3 Are Transcribed from the Same Strand as *CARD14***

cDNA was generated either with oligonucleotides that would prime the sense strand of *CARD14* mRNA (5'-AGCTGGACGAGGAGGAGGT-3') or the antisense strand (5'-CCTAAGAGCTGAGGCTGGGC-3'). Following amplification of cDNA with the same antisense primer and a nested sense primer (5'-CTGCAGCCTGATGTTGACTT-3'), a cDNA product of the predicted size of 409bp was only detected when RNA from GEN001 uninvolved or involved skin was used with *CARD14* mRNA primed for cDNA preparation in the sense direction (lanes 1 and 5). No specific product was detected with an oligonucleotide used to prime the antisense strand of *CARD14* mRNA (lanes 2 and 6). Moreover, the novel *CARD14* isoform was only seen with RNA from an individual from family PS1 (GEN001). No specific PCR product was seen when RNA from involved skin of classic psoriasis was subjected to cDNA preparation with either oligonucleotide (lanes 9 [sense] and 10 [antisense]). Negative controls for reverse transcriptase (RT) are shown in lanes 3, 4, 7, 8, 11, and 12. (All reagents except RT were used in the adjacent experiments). The strand of cDNA used for each PCR reaction is indicated by the "+" and "-" symbols above the image of the gel. The size, in base pairs (bp), of the ladder bands is indicated to the left and right. Lane numbers are listed below the gel, and the lanes corresponding to GEN001 uninvolved, GEN001 involved, and the classic psoriasis sample are indicated. L – ladder (1 Kb Plus DNA ladder from Invitrogen).

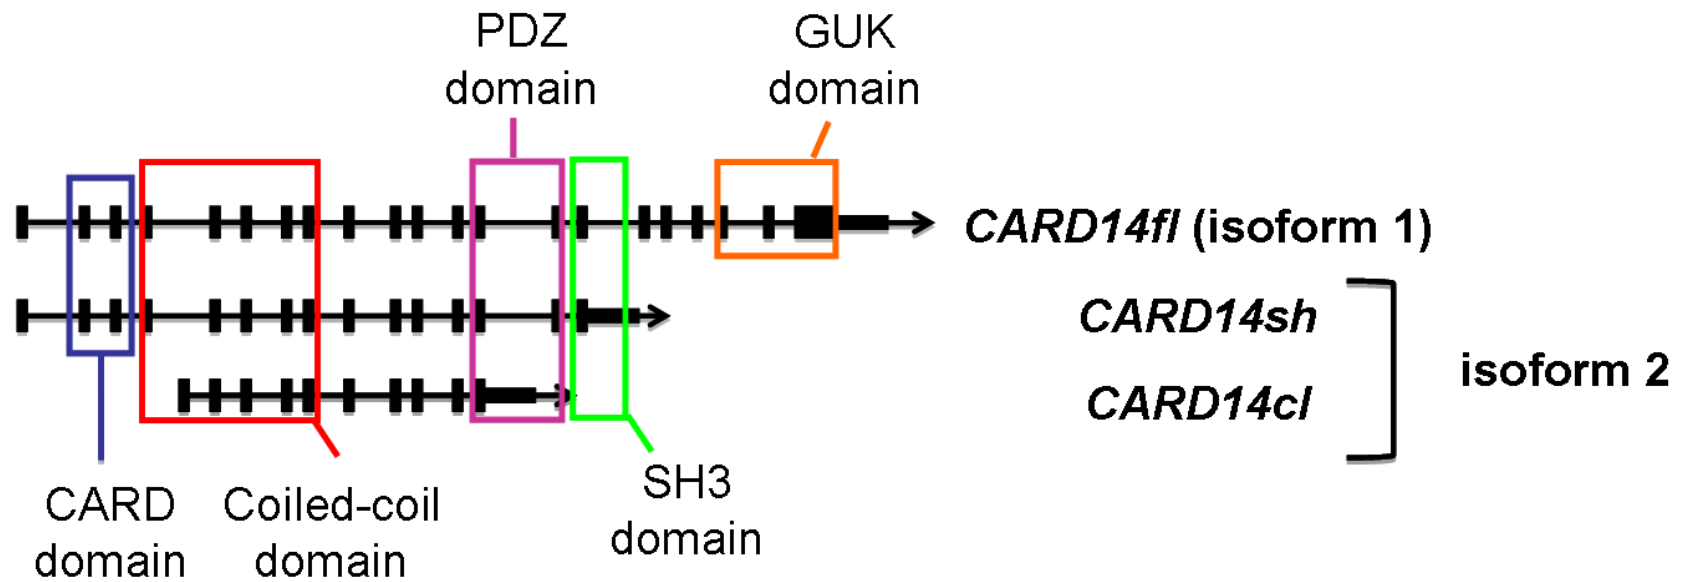

**Figure S5. CARD14 Isoforms**

There are several described isoforms of *CARD14* which differ in their N- and C-termini. They are represented below. *CARD14fl* is the full-length isoform. In the main article text, we discuss two other isoforms: *CARD14sh*, and *CARD14cl*. Black boxes represent exons. The major protein domains are highlighted.

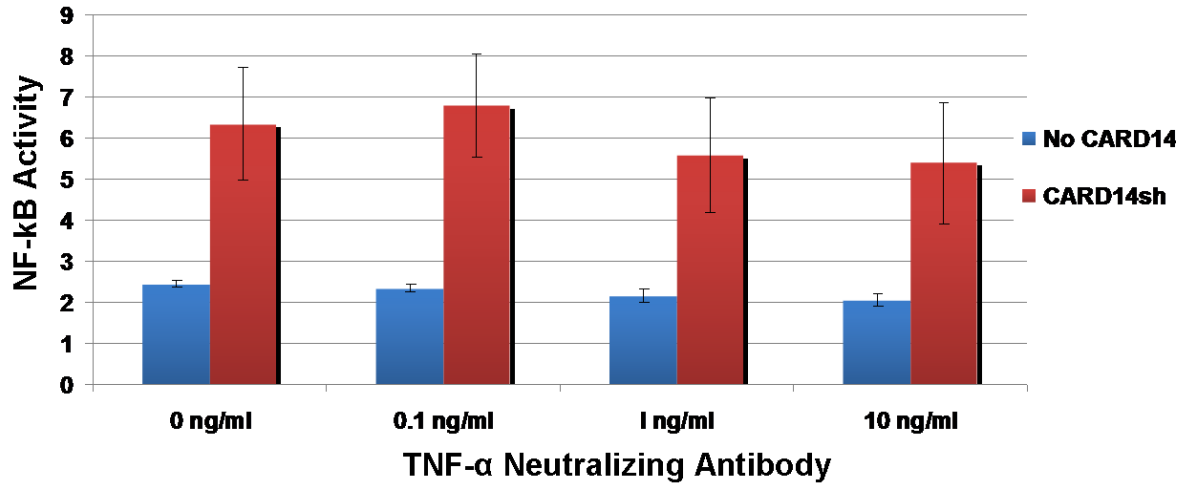

**Figure S6. Effect of TNF- $\alpha$  Neutralization**

HEK 293 cells were transfected with luciferase reporter vectors for NF-kB activation with or without *CARD14sh*. Cells were then treated with the indicated amounts of TNF- $\alpha$  neutralizing antibody, and relative luciferase activity was measured to determine NF-kB activity. All values were first normalized to *Renilla* expression, then adjusted relative to background levels of pTAL-Luc (see Methods). Error bars represent standard deviation of replicates.

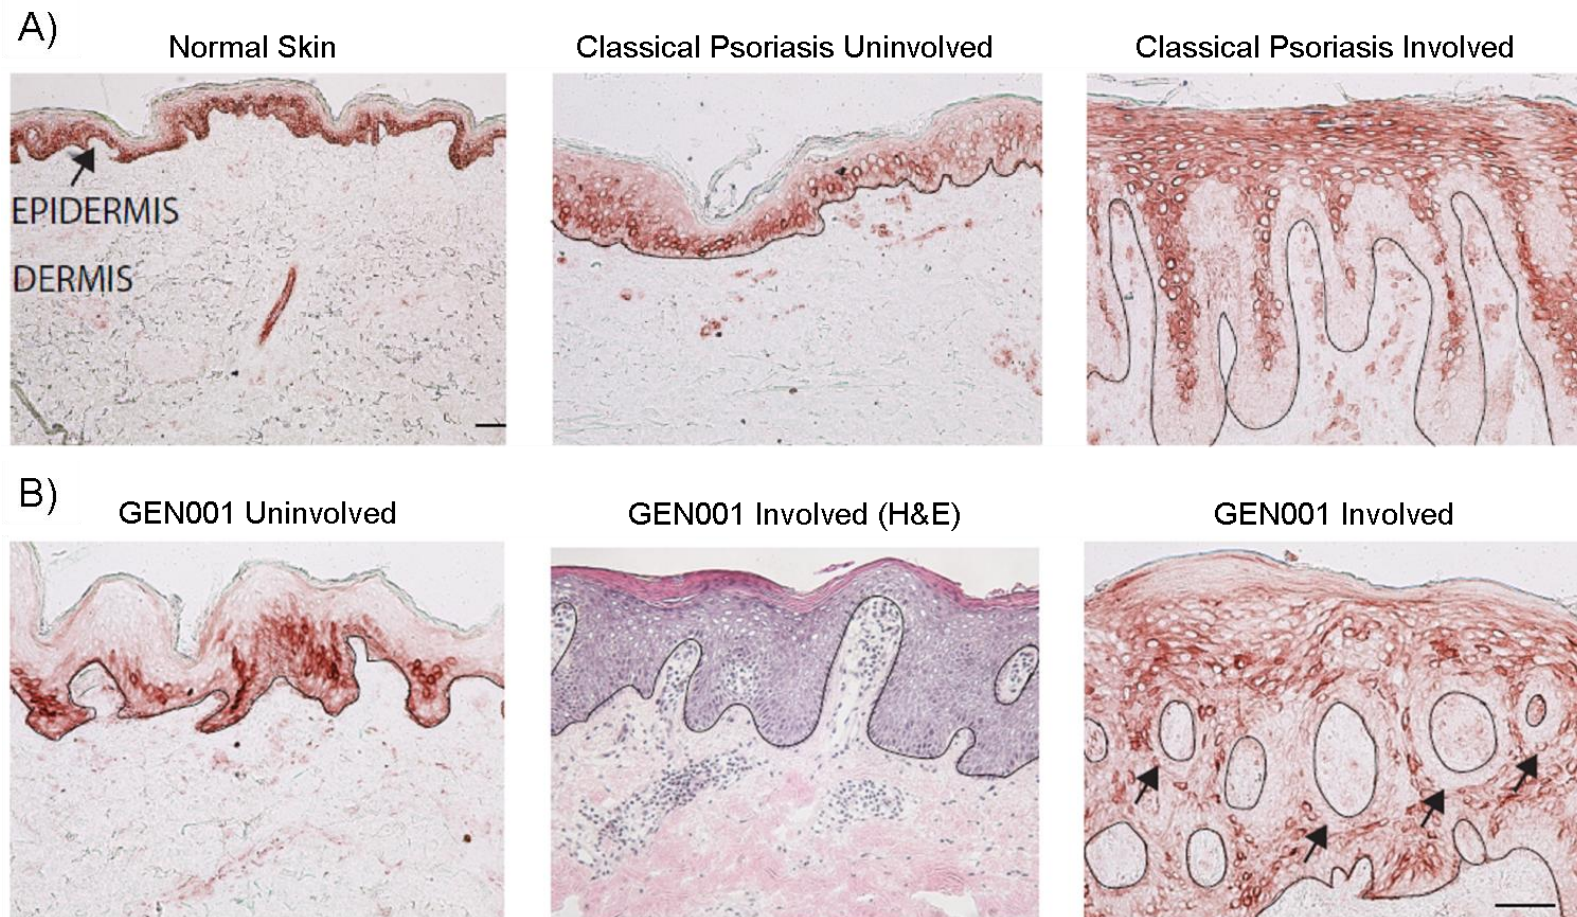

**Figure S7. Distribution of CARD14 Protein in Normal and Psoriatic Skin, at Higher Magnification**

Representative images for normal and psoriatic (uninvolved and involved) skin labeled with a polyclonal antibody to the internal coiled-coil domain of CARD14 that is shared by all known isoforms, and haematoxylin and eosin (H&E).

(A) Normal skin and classical psoriasis (Ps) uninvolved and involved.

(B) GEN001- PS1 affected uninvolved and involved. Black line denotes dermo-epidermal junction, with epidermis above and dermis below, lesional skin cut on cross section with dermis evident as islands projecting upwards into epidermis (identified by black arrows). GEN001 involved H&E is shown to aid orientation of GEN001 lesional tissue. Size bar 100 $\mu$ m.

**Table S1. Results of Exome- and Targeted-Capture/NextGen Sequencing**

| <b>Sample</b>   | <b>Platform</b> | <b>Type of Seq.</b> | <b># Cycles</b> | <b># Raw Reads</b> | <b>Gb Raw Reads</b> | <b># Aligned Reads</b> | <b>% Aligned</b> | <b>Gb Aligned Reads</b> | <b>% Reads On-Target</b> | <b>Fold Enrichment</b> |
|-----------------|-----------------|---------------------|-----------------|--------------------|---------------------|------------------------|------------------|-------------------------|--------------------------|------------------------|
| PS1-001         | Exome           | SE                  | 36              | 31,124,328         | 1.12                | 15,355,557             | 49.34            | 0.55                    | NA                       | NA                     |
| PS1-001         | Exome           | PE                  | 76              | 29,396,568         | 4.47                | 10,750,515             | 36.57            | 1.63                    | 79.00                    | 79.32                  |
| PS1-008         | Exome           | PE                  | 76              | 31,371,825         | 4.77                | 27,108,593             | 86.41            | 4.12                    | 88.61                    | 109.50                 |
| PS1-014         | Exome           | PE                  | 76              | 28,228,119         | 4.29                | 19,896,288             | 70.48            | 3.02                    | 8.98                     | 9.70                   |
| PS1-026         | Exome           | PE                  | 76              | 28,913,202         | 4.39                | 25,215,994             | 87.21            | 3.83                    | 88.70                    | 118.30                 |
| Affected pool   | Targeted        | PE                  | 76              | 32,985,821         | 5.014               | 12,985,204             | 39.37            | 1.97                    | 36.42                    | 326.70                 |
| Unaffected pool | Targeted        | PE                  | 76              | 31,048,657         | 4.72                | 13,429,978             | 43.25            | 2.041                   | 35.94                    | 322.30                 |

Exome sequencing was performed on DNA from four affected members of family PS1 (PS1-001, PS1-008, PS1-014, and PS1-026). Genomic capture of the entire linkage region was performed with pools of DNAs from 14 affected and 8 unaffected individuals from family PS1. Single-end (SE) or paired-end (PE) sequencing was performed. Aligned reads are those that map to the hg19 reference genome. On-target reads are aligned reads that overlap the targeting “baits” used by the capture platforms. Fold enrichment is defined as the ratio of observed on-target reads to the number expected if the distribution of reads was random.



**Table S2. Mutations at PSORS2 (D17S784-qter) Detected by Exome and Targeted Capture**

| Gene            | Detected by Exome Capture | Detected by Targeted Capture | cDNA Change | Protein Change | Genomic Location (hg19) | Confirmed by Sanger Sequencing | Segregation with Disease |
|-----------------|---------------------------|------------------------------|-------------|----------------|-------------------------|--------------------------------|--------------------------|
| <i>CARD14</i>   | Yes                       | Yes                          | c.349G>A    | p.Gly117Ser    | chr17:<br>78,156,589    | Yes                            | Yes                      |
| <i>SLC26A11</i> | Yes                       | Yes                          | c.365A>G    | p.Tyr122Cys    | chr17:<br>78,196,584    | Yes                            | Yes                      |
| c17orf89        | No                        | Yes                          | c.416C>T    | None. 3'UTR    | chr17:<br>79,215,019    | Yes                            | No                       |
| c17orf55        | No                        | Yes                          | c.2199G>A   | None. 3'UTR    | chr17:<br>79,277,395    | Yes                            | Yes                      |
| <i>NARF</i>     | No                        | Yes                          | c.1276A>G   | p.Glu378Gly    | chr17:<br>80,445,942    | No                             | NA                       |

Known polymorphisms (SNPs found in dbSNP130 and eight previously exome-sequenced HapMap individuals)<sup>7</sup> were removed. Five alterations remained that were detected by at least one of the two capture platforms. All were potentially deleterious mutations, and all but one were confirmed with Sanger sequencing. All members of family PS1 were also sequenced for these variants and only the mutations in *CARD14* (c.349G>A;p.Gly117Ser) and *SLC26A11* (c.365A>G;p.Tyr122Cys) segregated with disease.

**Table S3. Number and Percentage of Different CARD14 Isoforms Due to Altered Splicing at the Exon 2–4 Region of *CARD14* in Normal and Psoriatic Skin (Classic and GEN001) Identified with RNA-Seq and PCR-Based Cloning and Sequencing of cDNA**

|                                                                                            | RNA-Seq         |                            |          | PCR-Based Cloning |
|--------------------------------------------------------------------------------------------|-----------------|----------------------------|----------|-------------------|
|                                                                                            | GEN001 Involved | Classic Psoriasis Involved | Normal   | GEN001 Involved   |
| Total number of contigs in region (based on 83 reads)                                      | 100% (34)       | 100% (14)                  | 100% (7) | 100% (44)         |
| Canonical splicing (c.349G)                                                                | 47% (16)        | 100% (14)                  | 100% (7) | 61.4% (27)        |
| Canonical splicing (c.349A)                                                                | 12% (4)         | 0% (0)                     | 0% (0)   | 6.8% (3)          |
| Splicing at minigene predicted site                                                        | 9% (3)          | 0% (0)                     | 0% (0)   | 4.5% (2)          |
| Splicing from exon 2 to 4                                                                  | 17% (6)         | 0% (0)                     | 0% (0)   | 27.3% (12)        |
| Termination within intron 3 after 838bp (59 amino acids after exon 3 and a 3'UTR of 661bp) | 15% (5)         | 0% (0)                     | 0% (0)   | NA                |

RNA was obtained from involved skin of an affected member of family PS1 (GEN001), the skin of healthy controls (normal) and involved skin of individuals with “classic” psoriasis. RNA-Seq and PCR-based cDNA cloning of samples were performed and analyzed as described in Methods. The region included for “Total number of contigs in region” is chr17:78,155,410-78,157,750. That includes the 3' end (39bp) of exon 2, all of exon 3, all of intron 3, and the 5' end of exon 4 (39bp). Contigs splicing correctly from exon 2-3 and purely exonic or intronic reads (i.e. those without evidence of splicing) were excluded from this count. Contig locations are also diagrammed in Supplementary Figure 3. For each isoform, the percentage of total RNA contigs is listed (number in parentheses). NA – not applicable.

**Table S4. Expression of *CARD14* Isoforms in Various Tissues**

| Tissue/Cell Line                 | Jordan et al. | Scudiero et al. <sup>8</sup> |
|----------------------------------|---------------|------------------------------|
| Hematopoietic/Leukocytes         | --            | SH                           |
| Hematopoietic/Jurkat             | FL,SH         | FL,SH                        |
| Hematopoietic/LBL cell line      | FL,SH         | --                           |
| Hematopoietic/Raji cell line     | --            | SH                           |
| Hematopoietic/THP1 cell line     | --            | SH                           |
| Hematopoietic/THP1+TZD cell line | --            | SH                           |
| Skin                             | FL,SH,CL      | --                           |
| Skin/HaCaT cell line             | FL,SH         | --                           |
| Skin/HEK001 cell line            | FL,SH,CL      | --                           |
| Thymus                           | FL,CL         | --                           |
| Trachea                          | FL,SH         | --                           |
| Bronchus/NHBE cell line          | --            | FL,SH                        |
| Bronchus/SAEC cell line          | --            | FL,SH                        |
| Cervix                           | FL,SH         | --                           |
| Cervix/Hela cell line            | --            | FL,SH,CL                     |
| Colon                            | FL            | --                           |
| Colon/cecum                      | --            | --                           |
| Colon/HT29 cell line             | --            | SH                           |
| Colon/HT29+TNFa cell line        | --            | SH                           |
| Lung/NCI-H596 cell line          | --            | FL,CL                        |
| Lung                             | FL            | --                           |
| Lung/SHP77 cell line             | --            | FL,SH                        |
| Placenta                         | FL,SH,CL      | --                           |

With qRT-PCR, we assayed for the presence of three *CARD14* isoforms (*CARD14fl*, *CARD14sh*, *CARD14cl*) in various human tissues using previously described primers.<sup>8</sup> These results are summarized below. All isoforms were expressed in skin and placenta although *CARD14sh* was the most abundant. *CARD14* isoforms were also expressed in several hematopoietic and epithelial-derived cell lines such as those of bronchus, cervix, colon and lung. *CARD14cl* had a very limited pattern of expression outside of skin and placenta. We also compare our results (Jordan et al.) with those of Scudiero et al.,<sup>8</sup> wherein the primers to differentiate these isoforms were initially described. FL – *CARD14fl*, SH – *CARD14sh*, CL – *CARD14cl*, -- Not interrogated.

**Table S5. Changes in Transcript Levels of Key Psoriasis Genes in Different Psoriatic Skin Samples, Keratinocyte Transfectants, and a Keratinocyte Cell Line from Family PS1 after TNF- $\alpha$  Stimulation**

|       |          | Skin Biopsies |              |               | Keratinocyte Transfectants |                    |                    | Immortalized Keratinocyte Lines |                   |                   |
|-------|----------|---------------|--------------|---------------|----------------------------|--------------------|--------------------|---------------------------------|-------------------|-------------------|
| Gene  | Cytoband | FC PP/NN      | FC PS1-PP/NN | FC Pust-PP/NN | FC CARD14sh / Control      | FC G117S/ CARD14sh | FC E138A/ CARD14sh | FC K1-1 tx/no-tx                | FC K1-20 tx/no-tx | FC K5-14 tx/no-tx |
| IL36G | 2q13d    | 20.90         | 25.38        | 20.28         | 1.12                       | 1.44               | 1.46               | 3.22                            | 1.95              | 3.38              |
| CCL20 | 2q36.3c  | 7.20          | 35.48        | 30.75         | 1.13                       | 1.34               | 1.90               | 1.13                            | 1.70              | 1.41              |
| IL8   | 4q13.3d  | 3.56          | 2.49         | 24.72         | 1.36                       | 2.10               | 2.41               | 1.05                            | 2.61              | 1.32              |
| SOD2  | 6q25.3f  | 3.23          | 3.43         | 6.17          | 1.12                       | 1.39               | 1.78               | 5.45                            | 1.84              | 5.75              |

Expression profiling was performed by interrogating Illumina bead arrays with RNA from normal skin from a healthy control (NN), skin from classic psoriasis (PP), involved skin from family PS1 (c.349G>A/p.Gly117Ser, PS1-PP) and involved skin from the individual with pustular psoriasis with the c.413A>C/p.Glu138Ala mutation (Pust-PP). RNA from HEK001 immortalized keratinocytes transfected with wildtype or mutant (c.349G>A/p.Gly117Ser [G117S] or c.413A>C/p.Glu138Ala [E138A]) CARD14sh was also profiled. RNA from an immortalized keratinocyte cell lines from uninvolved skin of affected members of family PS1 (K1-1 and K1-20) were profiled with and without stimulation by TNF- $\alpha$ . For comparison, an immortalized keratinocyte line from affected skin of a classic psoriasis case, K5-14, was also profiled with and without stimulation by TNF- $\alpha$ . Fold changes (FC) are shown for the indicated comparisons. NA – not applicable, IL36G – interleukin 36, gamma, CCL20 – chemokine (C-C motif) ligand 20, IL8 – interleukin 8, SOD2 – superoxide dismutase 2, mitochondrial.

**Table 6. Transcriptomes of Involved Skin from Classic Psoriasis, Family PS1, and the Pustular Psoriasis Case Exhibit Similar Differences Relative to Normal Skin**

| Gene      | Chr | Cytoband  | FC<br>PP/NN | FC<br>GEN001<br>/NN | FC<br>Pust./NN |
|-----------|-----|-----------|-------------|---------------------|----------------|
| PI3       | 20  | 20q13.12b | 162.85      | 204.77              | 199.63         |
| DEFB4     | 8   | 8p23.1e   | 138.48      | 108.46              | 226.27         |
| S100A7    | 1   | 1q21.3c   | 125.67      | 129.95              | 156.98         |
| S100A7A   | 1   | 1q21.3c   | 106.62      | 113.21              | 118.88         |
| SPRR2A    | 1   | 1q21.3c   | 99.65       | 96.66               | 112.76         |
| LOC728454 | 8   | 8p23.1f   | 98.74       | 88.14               | 133.81         |
| SPRR2F    | 1   | 1q21.3c   | 91.70       | 97.68               | 109.29         |
| SERPINB4  | 18  | 18q21.33b | 88.18       | 94.90               | 127.58         |
| SPRR2B    | 1   | 1q21.3c   | 76.41       | 81.75               | 67.41          |
| SPRR2C    | 1   | 1q21.3c   | 60.87       | 68.60               | 71.70          |
| S100A9    | 1   | 1q21.3c   | 48.19       | 48.15               | 44.82          |
| SERPINB3  | 18  | 18q21.33b | 39.63       | 41.77               | 48.76          |
| LCE3A     | 1   | 1q21.3b   | 36.17       | 41.93               | 31.86          |
| S100A8    | 1   | 1q21.3c   | 35.75       | 35.58               | 35.58          |
| TCN1      | 11  | 11q12.1d  | 31.41       | 23.13               | 54.35          |
| SPRR2D    | 1   | 1q21.3c   | 28.82       | 29.03               | 33.37          |
| AKR1B10   | 7   | 7q33b     | 27.20       | 27.15               | 38.11          |
| IL1F9     | 2   | 2q13d     | 20.90       | 25.38               | 20.28          |
| LOC729252 | 17  | 17p11.2f  | 17.47       | 6.01                | 36.50          |
| LOC400578 | 17  | 17p11.2h  | 17.39       | 7.34                | 34.76          |
| LCE3D     | 1   | 1q21.3b   | 16.28       | 20.15               | 16.85          |
| C10ORF99  | 10  | 10q23.1c  | 16.12       | 9.75                | 20.57          |
| MGC102966 | 17  | 17p11.2c  | 15.97       | 6.52                | 21.81          |
| LOC400578 | 17  | 17p11.2h  | 14.15       | 6.26                | 19.48          |
| KRT6C     | 12  | 12q13.13d | 13.33       | 7.68                | 27.01          |
| KRT16     | 17  | 17q21.2b  | 13.25       | 5.35                | 19.40          |
| DEFB103B  | 8   | 8p23.1e   | 12.75       | 9.86                | 14.23          |
| LCE3E     | 1   | 1q21.3b   | 12.11       | 17.87               | 11.32          |
| LCN2      | 9   | 9q34.11b  | 11.68       | 16.27               | 19.66          |
| DEFB103B  | 8   | 8p23.1e   | 10.40       | 6.65                | 12.37          |
| KYNU      | 2   | 2q22.2a   | 10.18       | 13.62               | 21.02          |
| PLA2G4D   | 15  | 15q15.1d  | 9.26        | 15.47               | 7.37           |
| FABP5     | 8   | 8q21.13b  | 9.24        | 12.45               | 11.36          |
| OAS2      | 12  | 12q24.13b | 8.92        | 12.37               | 4.53           |
| SERPINB3  | 18  | 18q21.33b | 8.89        | 15.95               | 31.68          |

|           |    |                       |      |       |       |
|-----------|----|-----------------------|------|-------|-------|
| SPRR1B    | 1  | 1q21.3c               | 8.59 | 5.47  | 9.86  |
| TMPRSS11D | 4  | 4q13.2b               | 8.49 | 10.38 | 12.92 |
| CHI3L2    | 1  | 1p13.3a               | 8.39 | 12.00 | 6.22  |
| IFI27     | 14 | 14q32.13a             | 8.12 | 9.42  | 4.42  |
| SPRR2E    | 1  | 1q21.3c               | 8.09 | 8.26  | 6.03  |
| CCL20     | 2  | 2q36.3c               | 7.20 | 35.48 | 30.75 |
| HAL       | 12 | 12q23.1a              | 7.13 | 13.36 | 1.73  |
| IGFL1     | 19 | 19q13.32b             | 6.90 | 4.02  | 3.09  |
| KRT6B     | 12 | 12q13.13d             | 6.73 | 2.24  | 7.20  |
| KRT6B     | 12 | 12q13.13d             | 6.67 | 2.05  | 7.83  |
| GJB2      | 13 | 13q12.11a             | 6.58 | 5.93  | 6.42  |
| ATP12A    | 13 | 13q12.12b             | 6.33 | 10.44 | 2.04  |
| SPRR2G    | 1  | 1q21.3c               | 6.23 | 5.69  | 5.72  |
| TGM1      | 14 | 14q12a                | 6.16 | 5.62  | 4.51  |
| IL1F5     | 2  | 2q13d                 | 6.02 | 6.99  | 5.06  |
| KRT16     | 17 | 17q21.2b              | 5.89 | 2.18  | 7.62  |
| FABP5L2   | 13 | 13q14.3d              | 5.72 | 6.56  | 6.64  |
| LOC387934 | 13 | 13q22.1a              | 5.66 | 8.63  | 12.85 |
| IFI6      | 1  | 1p35.3b               | 5.60 | 5.17  | 3.87  |
| HPSE      | 4  | 4q21.23a              | 5.47 | 7.94  | 3.56  |
| FLJ16165  | 19 | 19q13.2a              | 5.35 | 5.64  | 3.80  |
| HERC6     | 4  | 4q22.1b               | 5.26 | 6.62  | 2.16  |
| KRT6A     | 12 | 12q13.13d             | 5.18 | 5.14  | 4.52  |
| TEX101    | 19 | 19q13.31a             | 5.15 | 4.76  | 2.41  |
| KLK6      | 19 | 19q13.33d             | 5.14 | 5.37  | 7.45  |
| AKR1B15   | 7  | 7q33b                 | 5.11 | 5.63  | 10.04 |
| ECGF1     | 22 | 22q13.33b             | 5.03 | 5.39  | 5.88  |
| MX1       | 21 | 21q22.3a              | 5.02 | 6.04  | 2.91  |
| ZC3H12A   | 1  | 1p34.3c               | 5.02 | 4.01  | 4.64  |
| UPP1      | 7  | 7p12.3b               | 5.01 | 4.09  | 5.45  |
| SPRR2E    | 1  | 1q21.3c               | 5.01 | 4.84  | 4.96  |
| LOC642956 | 15 | 15q25.3a              | 4.99 | 4.22  | 4.15  |
| ARSF      | X  | Xp22.33b              | 4.98 | 6.48  | 2.68  |
| CARHSP1   | 16 | 16p13.2b              | 4.97 | 3.62  | 4.66  |
| CSTA      | 3  | 3q21.1a               | 4.96 | 6.71  | 5.43  |
| LOC440731 | 1  | 1q42.2a               | 4.95 | 4.44  | 6.53  |
| RPL29     | 3  | 3p21.1e               | 4.84 | 3.74  | 3.88  |
| FGFBP1    | 4  | 4p15.32d              | 4.83 | 3.62  | 6.40  |
| EPSTI1    | 13 | 13q14.11c-<br>q14.11d | 4.80 | 6.06  | 3.75  |
| S100A2    | 1  | 1q21.3c               | 4.77 | 2.35  | 4.87  |

|           |    |           |      |      |       |
|-----------|----|-----------|------|------|-------|
| GJB6      | 13 | 13q12.11b | 4.75 | 6.00 | 12.99 |
| CDC20     | 1  | 1p34.2a   | 4.60 | 3.17 | 3.01  |
| NAMPT     | 7  | 7q22.2c   | 4.60 | 4.30 | 4.89  |
| IFI6      | 1  | 1p35.3b   | 4.56 | 5.08 | 1.66  |
| PRSS27    | 16 | 16p13.3d  | 4.56 | 3.84 | 6.38  |
| OASL      | 12 | 12q24.31a | 4.51 | 4.82 | 2.52  |
| SLC16A10  | 6  | 6q21h     | 4.47 | 8.08 | 2.15  |
| S100A12   | 1  | 1q21.3c   | 4.41 | 5.08 | 11.98 |
| KYNU      | 2  | 2q22.2a   | 4.39 | 5.46 | 7.20  |
| ISG15     | 1  | 1p36.33b  | 4.25 | 5.30 | 2.72  |
| RPL29     | 3  | 3p21.1e   | 4.20 | 3.21 | 3.22  |
| POL3S     | 16 | 16p11.2c  | 4.17 | 1.20 | 1.68  |
| DSC2      | 18 | 18q12.1d  | 4.17 | 2.76 | 6.12  |
| ACPP      | 3  | 3q22.1c   | 4.16 | 8.78 | 1.82  |
| RGS20     | 8  | 8q11.23d  | 4.15 | 4.89 | 3.22  |
| KIAA0101  | 15 | 15q22.31a | 4.13 | 3.15 | 4.22  |
| FABP5L2   | 13 | 13q14.3d  | 4.12 | 4.54 | 5.13  |
| FABP5     | 8  | 8q21.13b  | 4.11 | 3.50 | 3.81  |
| CNFN      | 19 | 19q13.2c  | 4.07 | 4.00 | 3.44  |
| GJB6      | 13 | 13q12.11b | 4.05 | 3.67 | 7.25  |
| RPL14     | 3  | 3p22.1c   | 4.04 | 2.21 | 12.52 |
| KLK9      | 19 | 19q13.33d | 4.02 | 4.42 | 3.60  |
| SPRR1A    | 1  | 1q21.3c   | 4.00 | 4.83 | 3.74  |
| PARP9     | 3  | 3q21.1a   | 3.92 | 4.50 | 2.38  |
| HAL       | 12 | 12q23.1a  | 3.91 | 7.83 | 1.22  |
| ARG1      | 6  | 6q23.2a   | 3.90 | 5.54 | 2.17  |
| CCNB2     | 15 | 15q22.2a  | 3.88 | 4.39 | 4.16  |
| PITX1     | 5  | 5q31.1e   | 3.86 | 3.35 | 6.76  |
| SERPINB13 | 18 | 18q21.33b | 3.83 | 4.38 | 3.30  |
| SAMD9     | 7  | 7q21.2b   | 3.80 | 5.24 | 5.79  |
| STAT1     | 2  | 2q32.2b   | 3.80 | 5.92 | 4.95  |
| LOC650517 | 17 | 17q11.2   | 3.80 | 2.76 | 6.38  |
| ADAP2     | 17 | 17q11.2c  | 3.79 | 3.28 | 2.40  |
| LOC643150 | 10 | 10q33.2   | 3.74 | 3.17 | 1.55  |
| PDZK1IP1  | 1  | 1p33d     | 3.73 | 3.61 | 3.74  |
| IFI44L    | 1  | 1p31.1e   | 3.73 | 4.75 | 3.02  |
| A2ML1     | 12 | 12p13.31b | 3.71 | 4.56 | 2.45  |
| GM2A      | 5  | 5q33.1d   | 3.71 | 5.25 | 6.23  |
| TOP2A     | 17 | 17q21.2a  | 3.70 | 4.63 | 4.78  |
| STAT1     | 2  | 2q32.2b   | 3.69 | 5.09 | 3.32  |
| LRG1      | 19 | 19p13.3d  | 3.57 | 5.00 | 2.36  |

|          |    |           |      |      |       |
|----------|----|-----------|------|------|-------|
| KLK13    | 19 | 19q13.33d | 3.57 | 3.26 | 7.42  |
| LAMP3    | 3  | 3q27.1a   | 3.56 | 4.91 | 2.87  |
| SLC5A1   | 22 | 22q12.3a  | 3.56 | 5.30 | 1.96  |
| IL8      | 4  | 4q13.3d   | 3.56 | 2.49 | 24.72 |
| ALOX12B  | 17 | 17p13.1c  | 3.56 | 3.48 | 2.31  |
| FAM43A   | 3  | 3q29d     | 3.50 | 4.00 | 3.29  |
| IRF7     | 11 | 11p15.5d  | 3.49 | 3.72 | 2.77  |
| FUT3     | 19 | 19p13.3b  | 3.48 | 2.60 | 1.85  |
| ATP10B   | 5  | 5q34a     | 3.46 | 4.43 | 1.72  |
| XAF1     | 17 | 17p13.2a  | 3.46 | 4.78 | 1.29  |
| OAS3     | 12 | 12q24.13b | 3.45 | 3.93 | 2.71  |
| CCBP2    | 3  | 3p22.1a   | 3.44 | 3.09 | 2.51  |
| PTTG3P   | 8  | 8q13.1b   | 3.44 | 3.25 | 5.29  |
| AAK1     | 2  | 2p14a     | 3.43 | 2.19 | 4.26  |
| AQP3     | 9  | 9p13.3e   | 3.41 | 2.20 | 1.16  |
| C9ORF169 | 9  | 9q34.3    | 3.41 | 4.22 | 2.57  |
| NP       | 14 | 14q11.2b  | 3.41 | 3.48 | 4.56  |
| GBP1     | 1  | 1p22.2c   | 3.38 | 4.21 | 7.25  |
| GRHL3    | 1  | 1p36.11d  | 3.37 | 5.19 | 2.84  |
| CXCL10   | 4  | 4q21.1a   | 3.35 | 8.31 | 15.57 |
| RDH16    | 12 | 12q13.3a  | 3.35 | 4.08 | 2.59  |
| MPZL2    | 11 | 11q23.3d  | 3.33 | 2.86 | 3.95  |
| OAS1     | 12 | 12q24.13b | 3.31 | 2.76 | 2.28  |
| PRIC285  | 20 | 20q13.33e | 3.28 | 3.45 | 1.69  |
| CDH3     | 16 | 16q22.1c  | 3.27 | 1.45 | 4.31  |
| KLK10    | 19 | 19q13.33d | 3.27 | 2.79 | 4.99  |
| PLA2G4E  | 15 | 15q15.1d  | 3.27 | 3.79 | 2.18  |
| ABCA12   | 2  | 2q35a     | 3.26 | 3.82 | 1.64  |
| C18ORF45 | 18 | 18q11.2b  | 3.25 | 2.45 | 1.19  |
| CD24     | Y  | Yq11.222  | 3.24 | 3.69 | 3.42  |
| CDC45L   | 22 | 22q11.21c | 3.23 | 2.72 | 2.11  |
| SOD2     | 6  | 6q25.3f   | 3.23 | 3.43 | 6.17  |
| F12      | 5  | 5q35.3a   | 3.23 | 1.96 | 2.40  |
| UNC93A   | 6  | 6q27c     | 3.22 | 3.96 | 0.80  |
| OAS1     | 12 | 12q24.13b | 3.22 | 4.13 | 0.81  |
| SLC7A5   | 16 | 16q24.2b  | 3.21 | 1.78 | 2.74  |
| PGM2     | 4  | 4p14d     | 3.20 | 2.92 | 2.85  |
| GDPD3    | 16 | 16p11.2d  | 3.20 | 3.72 | 1.17  |
| OAS1     | 12 | 12q24.13b | 3.17 | 3.39 | 2.25  |
| PTTG1    | 5  | 5q33.3d   | 3.12 | 2.81 | 3.15  |
| IFI44    | 1  | 1p31.1e   | 3.08 | 5.14 | 2.46  |



|           |    |                    |      |      |      |
|-----------|----|--------------------|------|------|------|
| INA       | 10 | 10q24.33a          | 3.05 | 2.91 | 1.96 |
| PLA2G3    | 22 | 22q12.2c           | 3.05 | 2.82 | 1.99 |
| EHF       | 11 | 11p13c-p13b        | 3.04 | 4.18 | 3.53 |
| CCL22     | 16 | 16q13c             | 3.02 | 2.72 | 1.69 |
| CEP55     | 10 | 10q23.33b          | 3.02 | 3.22 | 2.96 |
| TYMP      | 22 | 22q13.33b          | 3.01 | 2.27 | 2.41 |
| NCALD     | 8  | 8q22.3b            | 0.33 | 0.45 | 0.52 |
| AQP5      | 12 | 12q13.13a          | 0.33 | 0.31 | 0.39 |
| LOC643719 | 19 | 19q13.11c          | 0.33 | 0.50 | 1.97 |
| AXL       | 19 | 19q13.2c           | 0.33 | 0.34 | 0.49 |
| FOXC1     | 6  | 6p25.3a            | 0.33 | 0.53 | 0.56 |
| KRTAP9-4  | 17 | 17q21.2a           | 0.33 | 0.32 | 0.57 |
| TGFBR3    | 1  | 1p22.2a-<br>p22.1e | 0.33 | 0.44 | 0.51 |
| LTBP4     | 19 | 19q13.2b           | 0.33 | 0.28 | 0.40 |
| ATP6V1B1  | 2  | 2p13.3c            | 0.33 | 0.44 | 0.52 |
| KRTAP17-1 | 17 | 17q21.2b           | 0.33 | 0.29 | 3.30 |
| MUC1      | 1  | 1q22a              | 0.33 | 1.28 | 0.19 |
| CLDN23    | 8  | 8p23.1d            | 0.33 | 0.32 | 0.54 |
| LAMC3     | 9  | 9q34.13a           | 0.33 | 0.29 | 0.38 |
| LCE1E     | 1  | 1q21.3b            | 0.33 | 0.31 | 0.18 |
| DAB2      | 5  | 5p13.1c            | 0.33 | 0.34 | 0.48 |
| ANGPTL2   | 9  | 9q33.3b            | 0.33 | 0.28 | 0.57 |
| C10ORF116 | 10 | 10q23.2a           | 0.32 | 0.38 | 0.59 |
| COL6A1    | 21 | 21q22.3f           | 0.32 | 0.25 | 0.42 |
| LPAR1     | 9  | 9q31.3b            | 0.32 | 0.47 | 0.39 |
| FADS2     | 11 | 11q12.2b           | 0.32 | 0.48 | 0.29 |
| LHFP      | 13 | 13q13.3e           | 0.32 | 0.33 | 0.73 |
| CRIP1     | 14 | 14q32.33d          | 0.32 | 0.30 | 0.34 |
| ELANE     | 19 | 19p13.3i           | 0.32 | 0.45 | 0.35 |
| SGCE      | 7  | 7q21.3b            | 0.32 | 0.35 | 0.63 |
| KAZALD1   | 10 | 10q24.31a          | 0.32 | 0.39 | 0.34 |
| CST6      | 11 | 11q13.1d           | 0.32 | 0.67 | 0.16 |
| PDGFRA    | 4  | 4q12c              | 0.32 | 0.36 | 0.54 |
| ISLR      | 15 | 15q24.1b           | 0.32 | 0.33 | 0.49 |
| GSTM3     | 1  | 1p13.3b            | 0.32 | 0.40 | 0.39 |
| KRT34     | 17 | 17q21.2b           | 0.32 | 0.28 | 1.64 |
| DBN1      | 5  | 5q35.3a            | 0.32 | 0.35 | 0.42 |
| HSPB6     | 19 | 19q13.12a          | 0.32 | 0.37 | 0.49 |
| CAMK2N1   | 1  | 1p36.12b           | 0.31 | 0.32 | 0.71 |
| CTNNBIP1  | 1  | 1p36.22d           | 0.31 | 0.26 | 0.22 |

|              |    |                       |      |      |      |
|--------------|----|-----------------------|------|------|------|
| SEPP1        | 5  | 5p12c                 | 0.31 | 0.66 | 0.96 |
| CTSF         | 11 | 11q13.1e              | 0.31 | 0.30 | 0.43 |
| COL5A1       | 9  | 9q34.3a               | 0.31 | 0.22 | 0.34 |
| SCGB2A2      | 11 | 11q12.3a              | 0.31 | 0.28 | 1.15 |
| KRTAP4-5     | 17 | 17q21.2a              | 0.31 | 0.33 | 1.04 |
| TPM1         | 15 | 15q22.2b              | 0.31 | 0.44 | 0.48 |
| COX7A1       | 19 | 19q13.12b             | 0.31 | 0.28 | 0.58 |
| MEG3         | 14 | 14q32.2b              | 0.31 | 0.37 | 0.31 |
| ACOX2        | 3  | 3p14.3a               | 0.31 | 0.68 | 0.35 |
| KRTAP26-1    | 21 | 21q22.11a             | 0.31 | 0.32 | 1.78 |
| MSMB         | 10 | 10q11.23b             | 0.31 | 0.52 | 0.40 |
| FCGRT        | 19 | 19q13.33b             | 0.31 | 0.32 | 0.59 |
| TPM1         | 15 | 15q22.2b              | 0.31 | 0.47 | 0.44 |
| SORBS1       | 10 | 10q23.33d             | 0.31 | 0.34 | 0.48 |
| EBF1         | 5  | 5q33.3c               | 0.31 | 0.35 | 0.63 |
| PMP22        | 17 | 17p12a                | 0.31 | 0.34 | 0.57 |
| GSTM1        | 1  | 1p13.3b               | 0.30 | 0.32 | 0.23 |
| LOC728946    | 17 |                       | 0.30 | 0.27 | 0.39 |
| HSD11B1      | 1  | 1q32.2b               | 0.30 | 0.50 | 0.27 |
| DPYSL3       | 5  | 5q32e                 | 0.30 | 0.44 | 0.47 |
| ZNF807       | 19 | 19q13.11c             | 0.30 | 0.46 | 1.45 |
| RARRES2      | 7  | 7q36.1c               | 0.30 | 0.29 | 0.93 |
| EFEMP2       | 11 | 11q13.1d              | 0.30 | 0.31 | 0.49 |
| SPRR4        | 1  | 1q21.3c               | 0.30 | 0.71 | 0.35 |
| TNMD         | X  | Xq22.1b               | 0.29 | 0.34 | 0.65 |
| LGALS1       | 22 | 22q13.1a              | 0.29 | 0.29 | 0.52 |
| TPSB2        | 16 | 16p13.3e              | 0.29 | 0.21 | 0.65 |
| SLIT3        | 5  | 5q35.1a-<br>q35.1b    | 0.29 | 0.27 | 0.53 |
| LOC100132535 | 9  | 9q34.11b              | 0.29 | 0.40 | 0.34 |
| LOC730743    | 17 | 17q21.2               | 0.29 | 0.29 | 0.57 |
| KRT85        | 12 | 12q13.13d             | 0.29 | 0.25 | 2.82 |
| CGNL1        | 15 | 15q21.3d              | 0.29 | 0.53 | 0.56 |
| CCL15        | 17 | 17q12b                | 0.29 | 0.36 | 0.45 |
| ACACB        | 12 | 12q24.11a-<br>q24.11b | 0.29 | 0.39 | 0.65 |
| MAMDC2       | 9  | 9q21.11b-<br>q21.11c  | 0.29 | 0.41 | 0.80 |
| COL1A1       | 17 | 17q21.33a             | 0.29 | 0.18 | 0.30 |
| TPR          | 1  | 1q31.1a               | 0.29 | 0.32 | 0.28 |
| GALNTL1      | 14 | 14q24.1d-<br>q24.1e   | 0.29 | 0.27 | 0.37 |

|           |    |                 |      |      |      |
|-----------|----|-----------------|------|------|------|
| LOC728946 | 17 |                 | 0.29 | 0.30 | 0.68 |
| ABI3BP    | 3  | 3q12.2a-q12.2b  | 0.29 | 0.49 | 0.59 |
| SERPING1  | 11 | 11q12.1a        | 0.29 | 0.30 | 0.67 |
| RNASE4    | 14 | 14q11.2b        | 0.28 | 0.30 | 0.48 |
| CILP      | 15 | 15q22.31b       | 0.28 | 0.31 | 1.01 |
| SFRP2     | 4  | 4q31.3d         | 0.28 | 0.28 | 0.39 |
| FZD4      | 11 | 11q14.2a        | 0.28 | 0.34 | 0.54 |
| LOC728255 | 17 | 17q21.2a        | 0.28 | 0.27 | 0.52 |
| KRTAP2-1  | 17 | 17q21.2a        | 0.28 | 0.31 | 0.70 |
| PDGFRB    | 5  | 5q33.1c         | 0.28 | 0.31 | 0.45 |
| KRTAP11-1 | 21 | 21q22.11a       | 0.28 | 0.24 | 2.60 |
| HBA1      | 16 | 16p13.3f        | 0.28 | 0.20 | 1.36 |
| COL1A2    | 7  | 7q21.3a         | 0.28 | 0.32 | 0.43 |
| F10       | 13 | 13q34c          | 0.28 | 0.31 | 0.43 |
| LOC126767 | 1  | 1p36.21d        | 0.28 | 1.37 | 0.14 |
| COL6A2    | 21 | 21q22.3f        | 0.28 | 0.19 | 0.31 |
| RNASE1    | 14 | 14q11.2b        | 0.28 | 0.34 | 1.26 |
| TAGLN     | 11 | 11q23.3b        | 0.27 | 0.22 | 0.54 |
| ELOVL3    | 10 | 10q24.32b       | 0.27 | 0.95 | 0.16 |
| DCN       | 12 | 12q21.33c       | 0.27 | 0.45 | 0.46 |
| HS.388347 | 10 | 10q26.11        | 0.27 | 0.41 | 0.44 |
| OLFML1    | 11 | 11p15.4b        | 0.27 | 0.31 | 0.43 |
| CPZ       | 4  | 4p16.1c         | 0.27 | 0.36 | 0.42 |
| TIMP2     | 17 | 17q25.3b-q25.3c | 0.27 | 0.33 | 0.37 |
| RHOBTB3   | 5  | 5q15c-q15d      | 0.27 | 0.30 | 0.33 |
| LCE1A     | 1  | 1q21.3b         | 0.27 | 0.32 | 0.10 |
| PPP1R1B   | 17 | 17q12c          | 0.27 | 0.25 | 0.65 |
| MSX1      | 4  | 4p16.2a         | 0.27 | 0.27 | 0.48 |
| C1QTNF1   | 17 | 17q25.3c        | 0.26 | 0.26 | 0.71 |
| CRYAB     | 11 | 11q23.1b        | 0.26 | 0.20 | 0.33 |
| CTSK      | 1  | 1q21.2c         | 0.26 | 0.44 | 0.50 |
| ACSBG1    | 15 | 15q25.1a        | 0.26 | 0.90 | 0.09 |
| SERPINA12 | 14 | 14q32.13a       | 0.26 | 0.32 | 0.08 |
| LCE1D     | 1  | 1q21.3b         | 0.26 | 0.28 | 0.11 |
| CPA3      | 3  | 3q24f           | 0.26 | 0.28 | 0.62 |
| FBLN5     | 14 | 14q32.12a       | 0.26 | 0.28 | 0.46 |
| MGST1     | 12 | 12p12.3d        | 0.26 | 0.49 | 0.24 |
| MYADM     | 19 | 19q13.41b       | 0.25 | 0.24 | 0.35 |
| TPSAB1    | 16 | 16p13.3e        | 0.25 | 0.17 | 0.39 |
| FGL2      | 7  | 7q11.23g        | 0.25 | 0.35 | 0.64 |

|          |    |                  |      |      |      |
|----------|----|------------------|------|------|------|
| PPAP2B   | 1  | 1p32.2c          | 0.25 | 0.45 | 0.72 |
| KRT86    | 12 | 12q13.13d        | 0.25 | 0.26 | 1.85 |
| ITM2A    | X  | Xq21.1b          | 0.25 | 0.35 | 0.42 |
| FGFBP2   | 4  | 4p15.32d         | 0.25 | 0.40 | 0.34 |
| COL6A2   | 21 | 21q22.3f         | 0.25 | 0.15 | 0.32 |
| RNASE4   | 14 | 14q11.2b         | 0.25 | 0.37 | 0.62 |
| FADS1    | 11 | 11q12.2b         | 0.24 | 1.23 | 0.20 |
| TPSAB1   | 16 | 16p13.3e         | 0.24 | 0.17 | 0.61 |
| PAMR1    | 11 | 11p13b-p13a      | 0.24 | 0.25 | 0.18 |
| AWAT2    | X  | Xq13.1b          | 0.24 | 0.76 | 0.14 |
| EFEMP1   | 2  | 2p16.1d          | 0.24 | 0.19 | 0.41 |
| AEBP1    | 7  | 7p13d            | 0.24 | 0.27 | 0.47 |
| CYBRD1   | 2  | 2q31.1c          | 0.24 | 0.41 | 0.52 |
| HRASLS3  | 11 | 11q12.3b-q13.1a  | 0.24 | 0.25 | 0.88 |
| ECM2     | 9  | 9q22.31a-q22.31b | 0.24 | 0.35 | 0.64 |
| GSTM2    | 1  | 1p13.3b          | 0.24 | 0.26 | 0.15 |
| IGFBP5   | 2  | 2q35c            | 0.24 | 0.71 | 0.71 |
| CCL14    | 17 | 17q12b           | 0.23 | 0.35 | 0.49 |
| KRT81    | 12 | 12q13.13d        | 0.23 | 0.25 | 1.14 |
| CTSG     | 14 | 14q12a           | 0.23 | 0.23 | 0.22 |
| SPARC    | 5  | 5q33.1d          | 0.23 | 0.31 | 0.49 |
| KRTAP9-4 | 17 | 17q21.2a         | 0.23 | 0.23 | 1.54 |
| PCOLCE   | 7  | 7q22.1c          | 0.23 | 0.20 | 0.36 |
| FSTL1    | 3  | 3q13.33b         | 0.22 | 0.27 | 0.48 |
| PPAP2B   | 1  | 1p32.2c          | 0.22 | 0.29 | 0.47 |
| GAL      | 11 | 11q13.2b         | 0.22 | 1.17 | 0.16 |
| KRTAP4-7 | 17 | 17q21.2          | 0.22 | 0.24 | 1.24 |
| MGST1    | 12 | 12p12.3d         | 0.22 | 0.68 | 0.25 |
| PLIN     | 15 | 15q26.1b         | 0.22 | 0.20 | 0.58 |
| KRTAP9-8 | 17 | 17q21.2a         | 0.22 | 0.19 | 0.69 |
| CYBRD1   | 2  | 2q31.1c          | 0.22 | 0.39 | 0.52 |
| COL12A1  | 6  | 6q13c-q14.1a     | 0.22 | 0.25 | 0.41 |
| SVEP1    | 9  | 9q31.3b          | 0.22 | 0.29 | 0.58 |
| GSN      | 9  | 9q33.2a          | 0.22 | 0.26 | 0.31 |
| PCOLCE2  | 3  | 3q23d            | 0.22 | 0.22 | 0.76 |
| PIP      | 7  | 7q34f            | 0.21 | 0.69 | 0.64 |
| SCGB1D2  | 11 | 11q12.3a         | 0.21 | 0.14 | 0.82 |
| PALM     | 19 | 19p13.3j-p13.3i  | 0.21 | 0.23 | 0.32 |
| CD34     | 1  | 1q32.2a          | 0.21 | 0.29 | 0.51 |

|           |    |           |      |      |      |
|-----------|----|-----------|------|------|------|
| MFAP4     | 17 | 17p11.2e  | 0.21 | 0.31 | 0.44 |
| LUM       | 12 | 12q21.33c | 0.21 | 0.24 | 0.92 |
| PODN      | 1  | 1p32.3c   | 0.21 | 0.31 | 0.60 |
| LOC399888 | 11 | 11p11.2b  | 0.20 | 0.27 | 0.23 |
| KRTAP9-3  | 17 | 17q21.2a  | 0.20 | 0.23 | 1.76 |
| KRT77     | 12 | 12q13.13d | 0.20 | 0.30 | 0.21 |
| FBLN2     | 3  | 3p25.1b   | 0.20 | 0.22 | 0.48 |
| COL1A2    | 7  | 7q21.3a   | 0.20 | 0.23 | 0.32 |
| CXCL12    | 10 | 10q11.21c | 0.20 | 0.20 | 0.49 |
| FBLN1     | 22 | 22q13.31c | 0.19 | 0.32 | 0.35 |
| CTHRC1    | 8  | 8q22.3c   | 0.19 | 0.32 | 0.68 |
| CFH       | 1  | 1q31.3c   | 0.19 | 0.32 | 0.63 |
| TIMP3     | 22 | 22q12.3a  | 0.19 | 0.21 | 0.32 |
| MGP       | 12 | 12p12.3e  | 0.19 | 0.36 | 0.78 |
| OLFML3    | 1  | 1p13.2b   | 0.19 | 0.20 | 0.32 |
| CFH       | 1  | 1q31.3c   | 0.19 | 0.32 | 0.53 |
| TSPAN8    | 12 | 12q21.1a  | 0.18 | 0.33 | 0.47 |
| HLA-DRB5  | 6  | 6p21.32b  | 0.18 | 0.17 | 0.21 |
| CFD       | 19 | 19p13.3i  | 0.17 | 0.29 | 0.51 |
| MGP       | 12 | 12p12.3e  | 0.17 | 0.33 | 0.86 |
| CXCL12    | 10 | 10q11.21c | 0.17 | 0.26 | 0.51 |
| CFH       | 1  | 1q31.3c   | 0.17 | 0.28 | 0.63 |
| FHL1      | X  | Xq26.3b   | 0.16 | 0.18 | 0.39 |
| IGFBP5    | 2  | 2q35c     | 0.16 | 0.41 | 0.45 |
| FBLN2     | 3  | 3p25.1b   | 0.16 | 0.20 | 0.34 |
| APOD      | 3  | 3q29e     | 0.16 | 0.25 | 0.42 |
| IL1F7     | 2  | 2q13d     | 0.16 | 0.15 | 0.04 |
| C5ORF46   | 5  | 5q33.1a   | 0.15 | 0.26 | 0.13 |
| IGFBP6    | 12 | 12q13.13e | 0.15 | 0.19 | 0.22 |
| CD248     | 11 | 11q13.1e  | 0.14 | 0.15 | 0.19 |
| CD34      | 1  | 1q32.2a   | 0.14 | 0.15 | 0.36 |
| IL1F7     | 2  | 2q13d     | 0.14 | 0.11 | 0.05 |
| PLAC9     | 10 | 10q22.3f  | 0.13 | 0.17 | 0.23 |
| ADH1A     | 4  | 4q23b     | 0.13 | 0.16 | 0.91 |
| DCN       | 12 | 12q21.33c | 0.13 | 0.19 | 0.27 |
| DCN       | 12 | 12q21.33c | 0.13 | 0.30 | 0.61 |
| H19       | 11 | 11p15.5b  | 0.13 | 0.11 | 0.24 |
| MFAP5     | 12 | 12p13.31b | 0.13 | 0.19 | 0.53 |
| FBLN1     | 22 | 22q13.31c | 0.13 | 0.11 | 0.14 |
| FBLN1     | 22 | 22q13.31c | 0.12 | 0.15 | 0.21 |
| PDGFRL    | 8  | 8p22b     | 0.12 | 0.18 | 0.41 |

|          |    |                    |      |      |      |
|----------|----|--------------------|------|------|------|
| LCE5A    | 1  | 1q21.3b            | 0.12 | 0.09 | 0.06 |
| THRSP    | 11 | 11q14.1a           | 0.11 | 0.81 | 0.13 |
| PI16     | 6  | 6p21.2c            | 0.11 | 0.25 | 0.46 |
| CLEC3B   | 3  | 3p21.31k           | 0.11 | 0.16 | 0.27 |
| CILP     | 15 | 15q22.31b          | 0.11 | 0.11 | 0.72 |
| KIAA1881 | 19 | 19p13.3            | 0.10 | 0.11 | 0.47 |
| FABP7    | 6  | 6q22.31c           | 0.10 | 0.14 | 0.06 |
| SCARA5   | 8  | 8p21.1e-<br>p21.1d | 0.09 | 0.14 | 0.18 |
| WISP2    | 20 | 20q13.12a          | 0.08 | 0.11 | 0.07 |
| MT4      | 16 | 16q13b             | 0.07 | 0.06 | 0.31 |
| CIDEC    | 3  | 3p25.3c            | 0.06 | 0.05 | 1.17 |
| FABP4    | 8  | 8q21.13b           | 0.06 | 0.07 | 1.18 |

Global expression profiling was performed on involved skin from classic psoriatic skin, an affected member of family PS1 (individual GEN001), and the child with pustular psoriasis, individual 2192, who carried the *de novo* CARD14 mutation (pust.). Normal skin was also profiled. This table provides fold changes of transcripts that most strongly differentiate classic psoriasis from normal skin, and compares them with those of GEN001 (PS1) and 2192 (Pust.). Chr – chromosome, FC – fold change in transcript level, PP/NN – involved skin versus normal skin.

## References

1. Kent, W.J., Sugnet, C.W., Furey, T.S., Roskin, K.M., Pringle, T.H., Zahler, A.M., and Haussler, D. (2002). The human genome browser at UCSC. *Genome Res* 12, 996-1006.
2. Chenna, R., Sugawara, H., Koike, T., Lopez, R., Gibson, T.J., Higgins, D.G., and Thompson, J.D. (2003). Multiple sequence alignment with the Clustal series of programs. *Nucleic Acids Res* 31, 3497-3500.
3. Larkin, M.A., Blackshields, G., Brown, N.P., Chenna, R., McGettigan, P.A., McWilliam, H., Valentin, F., Wallace, I.M., Wilm, A., Lopez, R., et al. (2007). Clustal W and Clustal X version 2.0. *Bioinformatics* 23, 2947-2948.
4. Trapnell, C., Pachter, L., and Salzberg, S.L. (2009). TopHat: discovering splice junctions with RNA-Seq. *Bioinformatics* 25, 1105-1111.
5. Langmead, B., Trapnell, C., Pop, M., and Salzberg, S.L. (2009). Ultrafast and memory-efficient alignment of short DNA sequences to the human genome. *Genome Biol* 10, R25.
6. Trapnell, C., Williams, B.A., Pertea, G., Mortazavi, A., Kwan, G., van Baren, M.J., Salzberg, S.L., Wold, B.J., and Pachter, L. (2010). Transcript assembly and quantification by RNA-Seq reveals unannotated transcripts and isoform switching during cell differentiation. *Nat Biotechnol* 28, 511-515.
7. Ng, S.B., Turner, E.H., Robertson, P.D., Flygare, S.D., Bigham, A.W., Lee, C., Shaffer, T., Wong, M., Bhattacharjee, A., Eichler, E.E., et al. (2009). Targeted capture and massively parallel sequencing of 12 human exomes. *Nature* 461, 272-276.
8. Scudiero, I., Zotti, T., Ferravante, A., Vessichelli, M., Vito, P., and Stilo, R. (2011). Alternative splicing of CARMA2/CARD14 transcripts generates protein variants with differential effect on NF-kappaB activation and endoplasmic reticulum stress-induced cell death. *J Cell Physiol* 226, 3121-3131.
